# Supplementary material
Source: PubMed Central journal article supplement (PMC518829)
Supplement: pnas_101_38_13756__3.pdf [file pnas_101_38_13756__3.pdf]

| Mouse                                                                                                                                                                                                                                                                                                | Shared                                                                                                                                                                 | Human |                                                           |
|------------------------------------------------------------------------------------------------------------------------------------------------------------------------------------------------------------------------------------------------------------------------------------------------------|------------------------------------------------------------------------------------------------------------------------------------------------------------------------|-------|-----------------------------------------------------------|
| FFQEEVIPHHTWEK<br>FFQEEVIPHHTWEK<br>TVAHIQTVQHK<br>IFSSEHDIFR<br>QLLGINIAEK<br>IANYGTK<br>CIGAIAMTEPGAGSDLQGV<br>RSGSDWILNGSK<br>SPAHGISLFLVENG<br>MKLPANALLGEENK<br>GFYYLMQELPQER<br>RLDSGSASMAK<br>AQDTAELFFEDVR                                                                                   | GGWGYMWEYPIAK<br>VQPIYGGTNEIMK                                                                                                                                         | -     | mLong Chain Specific<br>Acyl-CoA Dehydrogenase<br>(mLCAD) |
| LVELEVLGDGHEPDGGQR<br>ALAYYNYDDLPK<br>SEFYADEISK<br>IFSSEHDIFR<br>QLLGINIAEK                                                                                                                                                                                                                         | -                                                                                                                                                                      | -     | mAcyl-CoA Thioesterase<br>(mACAT)                         |
| HLLPPVDDTTQGK<br>NPPETDPTEHTEHK<br>EGASEEETNLSKM<br>TESELLEISGK<br>EGYLQIGATTQQAQR<br>YISEGFQPVAVFLGVPFAKPP<br>LGSRLYRPSFVSDQ<br>MNEETASLLLR<br>YRPSFVSDK<br>ILSDMFSTE<br>ISEDCLYLNISPADLTK<br>LDQLAALR<br>FHSELNISESMIPAVIEQ<br>DAGVSTYMYEFR<br>NGNPNGEGLPHWPEYDEQ<br>GNWGHLDQVAALR<br>YLNIYSPADLTK | AISESGVSLTAALITTDVKPIAGL<br>VATLSGCKT<br>APEEILAEKS<br>DGASEEETNLSKM<br>IGASTQAAQRL<br>SAHENVVVTIQYR<br>PSSPPVNTVKG<br>FFSTGDEHSRG*<br>YLGGTDDLTKK<br>FLKDGASEEETNLSKM | -     | mCarboxylesterase-1<br>(mCE-1)                            |
| AFSGYLGPDESK<br>SGYQQAASEHGLVVIAPDTSSPR<br>SVSAFAPICNPVLCSWGK<br>FAVYLPQAESGK                                                                                                                                                                                                                        | YVTEELPQLINANFPVDPQR                                                                                                                                                   | -     | mEsteraseD                                                |

Mouse

Shared

Human

APEEVSDHNYESIQTSAQK  
HVLHVQLNRPEK  
ELVECFQK  
MFTSGIDLMDASELMQPSGDDAAR  
IGGGVDLVSACDIR  
YCTQDAFFQIK  
EVDMGLAADVGTLQR  
VIGNQSLVNETFSAR  
MMADEALDSGLVSR  
DAMLNAAFAL  
ALAADISSK  
DHSVDESLDYMATWN  
MSMLQTQDIK  
VAGHPDVVINNAAGNFISPSE  
EWDIIEGLIR

VAFITGGGTGLGK

-

mEnoyl-CoA Hydratase  
(mECH)

VAASVDLITK  
QAPLLIGSTK  
GYTVLGVEGR  
YHGNVTLR  
SEAVVAVLLTK  
SDEAVKPLGVK  
LGMLSPDGTGR  
LGPVGGVFNLAMVLR  
LKEDTQVADVTTSR  
VYATILNAGTNTDGSK  
VSDLLLSTDER  
SFDDSGSGYCR  
VYLWEDPNSK  
AAMLGQEDPPQHGLPR  
GNAGQTNYGANSTMER  
WLSTSIPEAQWQSSLAR  
LFDHPEVPTPPESASVSR  
LLLPEPLISGLLNSQALK  
VAEVLAGEGHLYSR  
CILLSNLSNTSHAPK  
SNMGHPEPASGLAALTK  
DPETLLGYSMVGCQR  
EEEEPAVLPGAQPTLISAISK  
HFQLEQDKPK  
LQVDRPLPVR  
DCMLGMEFSGR  
QQEQLVPTLEK  
EDTQVADVTTSR  
VTAIYIDPATHR  
DNLEFFLTNLGK  
LDPGSPELQQVLK  
TLEAVQDLLEQGR  
FPQLDDTSFANSR  
DAMLENQTPELFQDVNPKK  
TGGTYGEDLGADYNLSQVCDGK  
FVFTPHMEAECLESTALQK  
GYDYGPFQFGICEATLEGEQK  
VHLTGINVNPALFPPVEFPAPR  
GTNTGVWVGSGSEASEALSR

LSPDAIPGK  
TGTVALEVR  
VLEALLPLK  
VFTTVGSAEK  
VQVQEGPYR  
HDLVMNVYR  
FDASFFGVHPK  
VGDPQELNGITR  
GVDLVLNSLAEEK

-

mFatty Acid Synthase  
(mFAS)

| Mouse | Shared                                                                                                                                                 | Human                                                             |                                                            |
|-------|--------------------------------------------------------------------------------------------------------------------------------------------------------|-------------------------------------------------------------------|------------------------------------------------------------|
| -     | GSTGFGQDSILSLPGNVGHQDVK                                                                                                                                | ALDVSASDDEIAR<br>VTSVVVDVVR<br>VGFLPSAGK                          | hAcyl-Peptide<br>Hydrolase (APH)                           |
| -     | -                                                                                                                                                      | AAPDQDEIQL<br>FYATNDTEVAQSNFEALQDFFRL<br>DLECVTNLQEVAR            | hCathepsinA                                                |
| -     | -                                                                                                                                                      | NFNIAKILAQQ<br>AINIADELPR<br>VNLDAQTQLDK<br>LLDGEAALPAVVFLHGLFGSK | hFLJ11342                                                  |
| -     | HEVININLK                                                                                                                                              | SQNKEDYAGLK<br>LNECVDHTPK<br>EDPTVSALLTSEK                        | hGlutathione<br>S-Transferase<br>Omega (GST-O-1)           |
| -     | PLLTDAATVSGAER<br>ETAAVIFLHGLGDTGHSWADALSTIR*<br>IPVTLMNK*<br>SPDAPEDEAGIKK*<br>DLAILQCHGELDPMVPVR*<br>TYPGVMHSSCPQEMA AVK<br>IDQEVK<br>LAGVTALSCWLPLR | YICPHAPVR<br>ASFPQGPIGGANR<br>TLVNPANVTFK                         | hLysophospholipase-A1<br>(hLyso-PL1)                       |
| -     | ETAVVIFLHGLGDTGHSWADALSTIR*<br>IPVTLMNK*<br>SPDAPEDEAGIKK*<br>DLAILQCHGELDPMVPVR*                                                                      | TYLGVMHSSCPQEMA AVK                                               | hDJ7053.6<br>(hLyso-PL2 homolog)                           |
|       |                                                                                                                                                        | ALIFVSHGAGEHSGR<br>VLANPESATTFK<br>IYEGAYHVLHK                    | hMono-Acyl Glycerol<br>Lipase (hMAG-Lipase)                |
| -     | AAEDIQGDDR<br>ELFSPLHALNFGIGDTR<br>NGELENIKPK<br>PLHELIMQLEETPEEK<br>LENGELEHIRPK<br>VVVLGLLPR                                                         | AIVQLVNER                                                         | hPlatelet-Activating<br>Factor Acetylhydrolase<br>(PAF-AH) |

Mouse

Shared

Human

-

GLAPEQPVTLR

ADTLGELDLER  
ALAYNYEDLPK  
GETLPPVGVNR

hPeroxisomal Long-Chain Acyl CoA Thioesterase (PTE)

-

-

AQCHSVPVK  
VYTAQNPSAQUALGLGK  
FPPHHLTIVLGR  
PGEEEQKFEVEK  
EFDDDTYDNDIALLQLK  
HEALSPFYSER  
TVTDNMLCAGDTR  
ATCYEDQGGSYR

hTissue-Type Plasminogen Activator (htPA)

-

-

IIGGEFTTIENQPWFAAIYR  
KEDYIVYLGR  
FEVENLILHK  
DYSADTLAHHNDIALLK  
MLCAADPQWK  
VSHFLPWIR

hUrokinase-Type Plasminogen Activator (huPA)
