# Supplementary material
Source: PubMed Central journal article supplement (PMC518829)

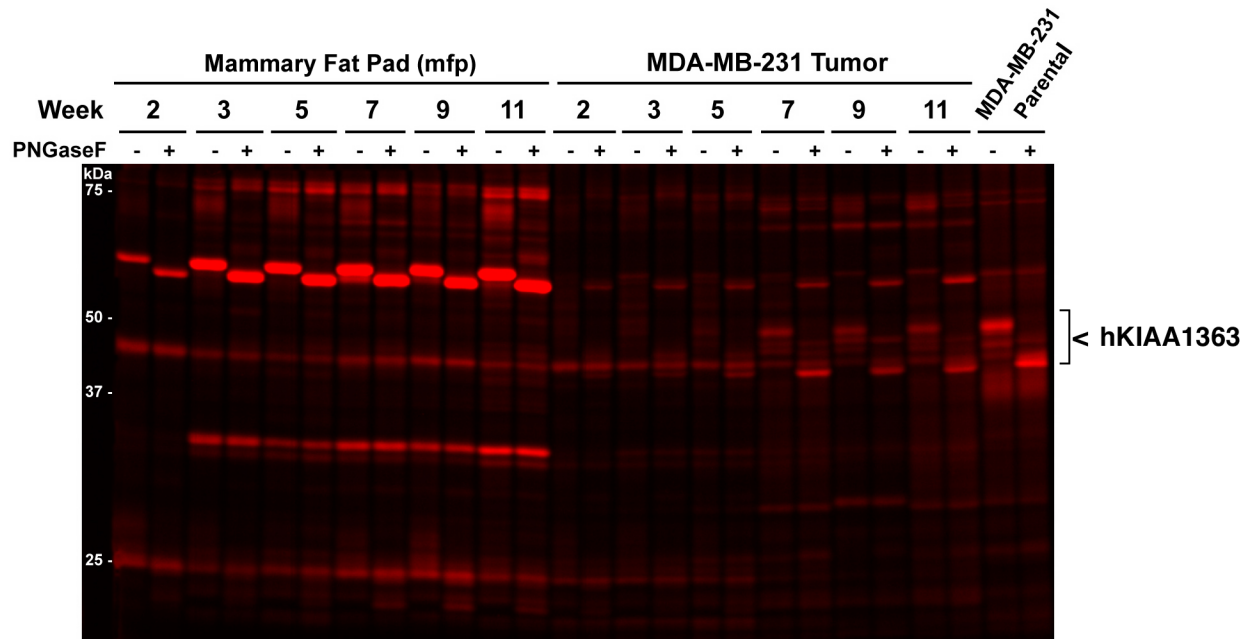

**Membrane Proteomes**

Supplement: pnas_101_38_13756__2.pdf [file pnas_101_38_13756__2.pdf]

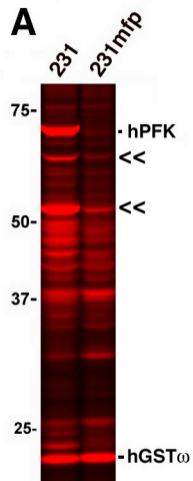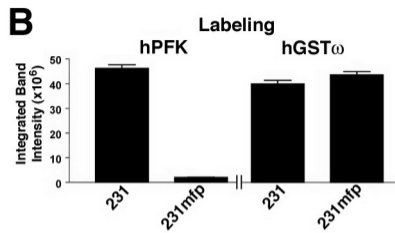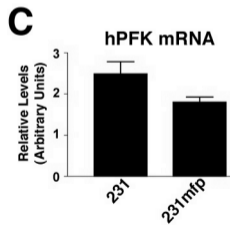

Supplement: pnas_101_38_13756__4.pdf [file pnas_101_38_13756__4.pdf]

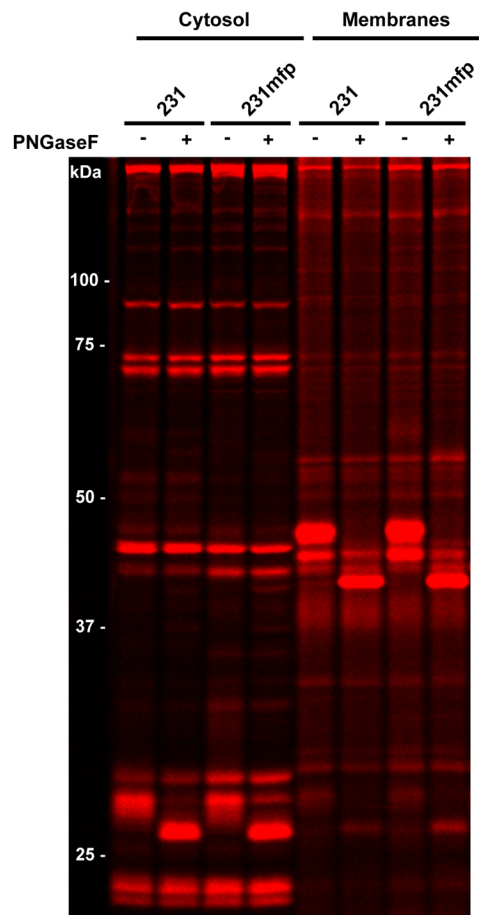

Supplement: pnas_101_38_13756__5.pdf [file pnas_101_38_13756__5.pdf]

## PAI-1 mRNA

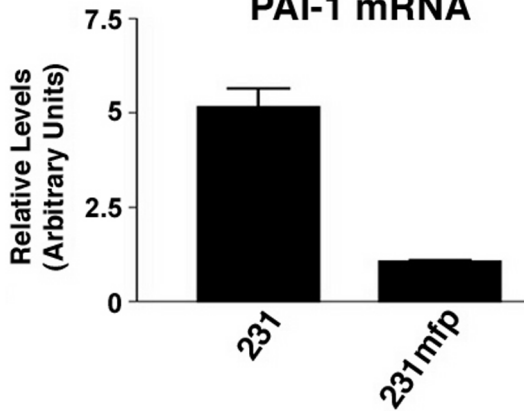

Supplement: pnas_101_38_13756__6.pdf [file pnas_101_38_13756__6.pdf]

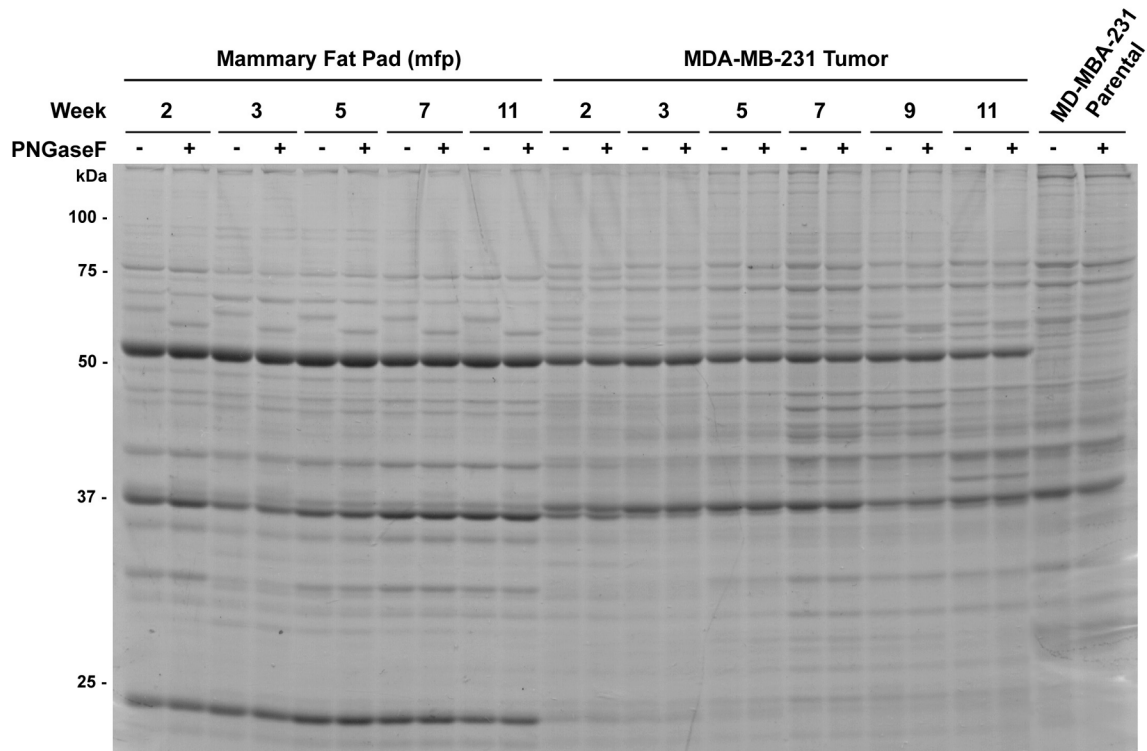

Supplement: pnas_101_38_13756__7.pdf [file pnas_101_38_13756__7.pdf]
